# Supplementary material for: Stabilization of myeloid-derived HIFs promotes vascular regeneration in retinal ischemia
Source: PubMed Central journal article supplement (PMC7160070; doi:10.1007/s10456-019-09681-1), 2019-10-03

# ESM 1

A

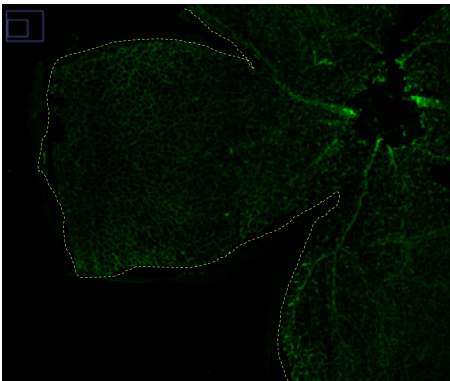

B

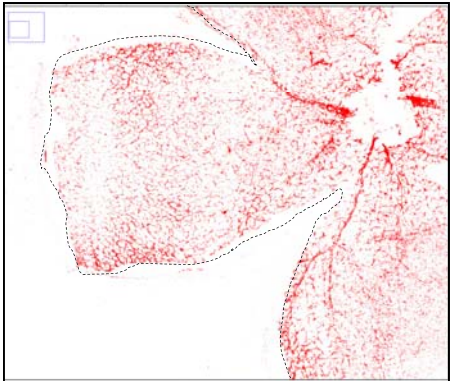

Supplement: 10456_2019_9681_MOESM1_ESM.pdf [file 10456_2019_9681_MOESM1_ESM.pdf]
