# Supplementary material for: Stabilization of myeloid-derived HIFs promotes vascular regeneration in retinal ischemia
Source: Springer Nature journal article supplement (doi:10.1007/s10456-019-09681-1), 2019-10-03

# ESM 3

**A**

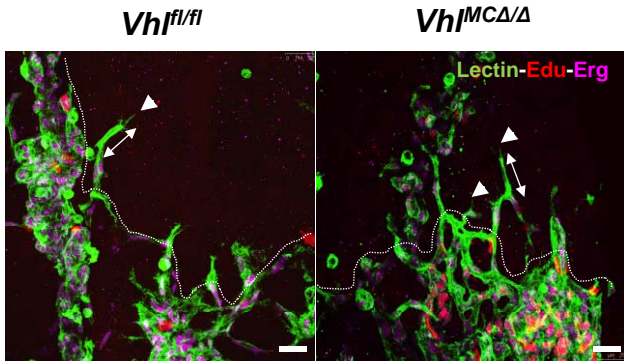

**B**

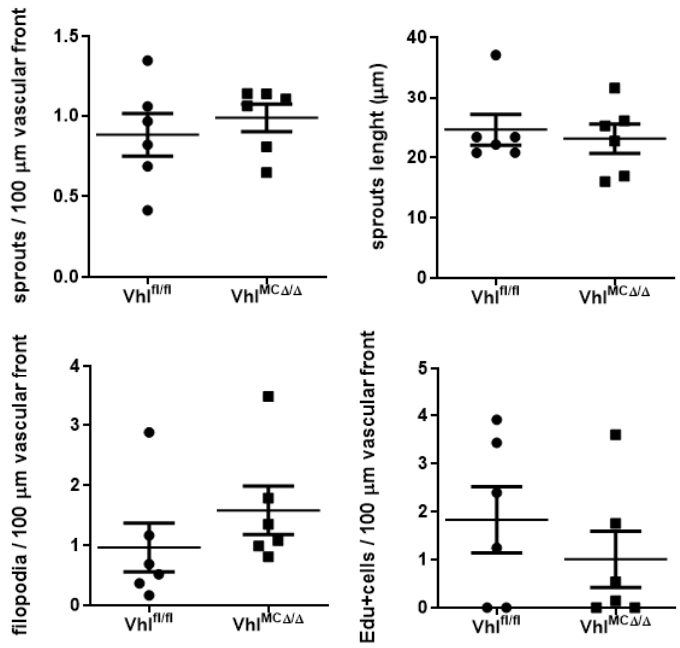

**C**

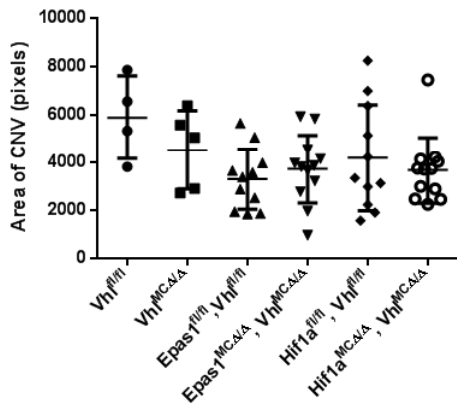

**D**

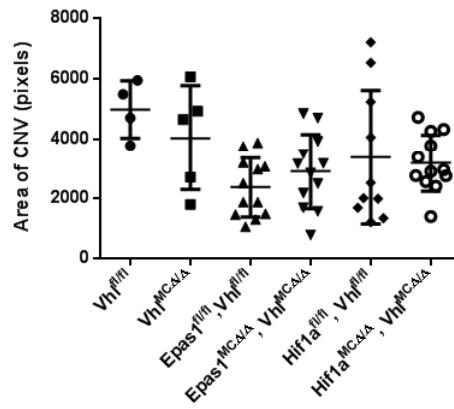

**E**

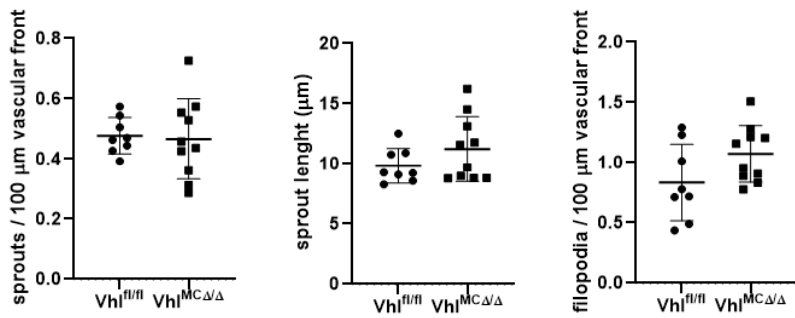

Supplement: MOESM3 [file 17236680]
